# Supplementary material for: Biomechanics of byssal threads outside the Mytilidae: Atrina rigida and Ctenoides mitis
Source: Oxford University Press journal article supplement (doi:10.1242/jeb.025551), 2009-05-01
Supplement: jeb025551-sup-025551-tables1.pdf [file jeb025551-sup-025551-tables1.pdf]

|                          |       |       |         |         |          |         |         |       |         |        |       |        |        |        |
|--------------------------|-------|-------|---------|---------|----------|---------|---------|-------|---------|--------|-------|--------|--------|--------|
| <i>Geukensia demissa</i> | 5.38  | 58.28 | 0.00267 |         |          |         |         |       |         |        |       |        |        |        |
| <i>Geukensia demissa</i> | 4.34  | 50.01 | 0.00196 |         |          |         |         |       |         |        |       |        |        |        |
| <i>Geukensia demissa</i> | 5.02  | 30.04 | 0.00071 |         |          |         |         |       |         |        |       |        |        |        |
| <i>Geukensia demissa</i> | 6.79  | 46.28 | 0.00168 | 0.13816 | 6.87994  | 82.132  | 165.352 | 23.41 | 384.91  | 317.78 | 56.56 | 1.0132 | 0.6997 | 0.0661 |
| <i>Geukensia demissa</i> | 3.50  | 42.72 | 0.00143 | 0.13497 | 4.10649  | 94.163  | 204.643 | 18.53 | 229.20  | 376.36 | 65.61 | 1.1733 | 0.7762 | 0.0741 |
| <i>Geukensia demissa</i> | 6.88  | 55.40 | 0.00241 | 0.13980 | 7.66804  | 57.994  | 122.632 | 19.13 | 201.50  | 261.36 | 39.96 | 1.1145 | 0.7488 | 0.1150 |
| <i>Atrina rigida</i>     | 7.33  | 27.60 | 0.00060 |         |          |         |         |       |         |        |       |        |        |        |
| <i>Atrina rigida</i>     | 11.51 | 69.97 | 0.00385 |         |          |         |         |       |         |        |       |        |        |        |
| <i>Atrina rigida</i>     | 7.13  | 76.30 | 0.00457 | 0.10470 | 3.61183  | 22.899  | 34.499  | 11.15 | 225.94  | 39.81  | 8.35  | 0.5066 | 0.4098 | 0.0534 |
| <i>Atrina rigida</i>     | 9.65  | 46.54 | 0.00170 | 0.11420 | 6.70146  | 67.134  | 113.755 | 29.64 | 505.31  | 217.15 | 34.30 | 0.6945 | 0.5274 | 0.0674 |
| <i>Atrina rigida</i>     | 6.49  | 43.57 | 0.00149 | 0.14252 | 3.06528  | 95.591  | 140.739 | 38.54 | 1048.31 | 70.04  | 30.01 | 0.4723 | 0.3868 | 0.0582 |
| <i>Atrina rigida</i>     | 9.98  | 49.37 | 0.00191 | 0.08328 | 3.74969  | 43.502  | 59.847  | 27.04 | 721.84  | 139.35 | 13.94 | 0.3757 | 0.3190 | 0.0434 |
| <i>Atrina rigida</i>     | 7.56  | 86.92 | 0.00593 |         |          |         |         |       |         |        |       |        |        |        |
| <i>Atrina rigida</i>     | 7.02  | 54.14 | 0.00230 | 0.10256 | 3.81781  | 44.550  | 68.779  | 23.81 | 620.98  | 111.07 | 18.94 | 0.5438 | 0.4343 | 0.0478 |
| <i>Atrina rigida</i>     | 14.42 | 39.78 | 0.00124 | 0.12650 | 5.83862  | 101.782 | 142.993 | 42.33 | 1168.09 | 379.98 | 27.78 | 0.4049 | 0.3400 | 0.0450 |
| <i>Atrina rigida</i>     | 7.89  | 68.82 | 0.00372 | 0.08961 | 3.20962  | 24.091  | 33.890  | 10.61 | 108.92  | 50.28  | 5.67  | 0.4068 | 0.3413 | 0.0875 |
| <i>Atrina rigida</i>     | 8.06  | 51.49 | 0.00208 | 0.12846 | 4.17625  | 61.691  | 93.656  | 23.44 | 549.82  | 147.01 | 22.45 | 0.5181 | 0.4175 | 0.0410 |
| <i>Atrina rigida</i>     | 6.93  | 57.66 | 0.00261 |         |          |         |         |       |         |        |       |        |        |        |
| <i>Atrina rigida</i>     | 7.84  | 40.11 | 0.00126 |         |          |         |         |       |         |        |       |        |        |        |
| <i>Atrina rigida</i>     | 8.36  | 70.58 | 0.00391 |         |          |         |         |       |         |        |       |        |        |        |
| <i>Atrina rigida</i>     | 12.30 | 49.18 | 0.00190 | 0.08747 | 3.94593  | 46.046  | 60.817  | 22.79 | 713.64  | 89.14  | 10.72 | 0.3208 | 0.2782 | 0.0389 |
| <i>Atrina rigida</i>     | 7.95  | 64.24 | 0.00324 | 0.06502 | 6.25867  | 20.061  | 35.853  | 9.11  | 182.66  | 65.44  | 12.20 | 0.7873 | 0.5807 | 0.0682 |
| <i>Atrina rigida</i>     | 8.91  | 49.67 | 0.00194 |         |          |         |         |       |         |        |       |        |        |        |
| <i>Atrina rigida</i>     | 9.47  | 47.53 | 0.00177 | 0.11327 | 6.52627  | 63.841  | 107.837 | 26.68 | 608.94  | 228.75 | 32.92 | 0.6892 | 0.5242 | 0.0509 |
| <i>Atrina rigida</i>     | 10.18 | 38.69 | 0.00118 | 0.07210 | 6.86849  | 61.326  | 102.703 | 24.28 | 707.30  | 227.26 | 31.91 | 0.6747 | 0.5156 | 0.0381 |
| <i>Atrina rigida</i>     | 15.30 | 52.76 | 0.00219 | 0.19236 | 15.59884 | 87.985  | 177.689 | 29.12 | 758.39  | 415.74 | 64.23 | 1.0195 | 0.7029 | 0.0455 |

Material properties of the byssal threads of selected bivalve molluscs. Empty cells represent missing values. 'Engineering' stress and strain ( $\sigma_E$ ,  $\epsilon_E$ ) are defined as  $\sigma_E = F/A_0$ =force/unit initial area,  $\epsilon_E = \Delta L/L_0$ =change in length/initial length; 'true' stress and strain ( $\sigma_T$ ,  $\epsilon_T$ ) are defined respectively as  $\sigma_T = \sigma_E \exp(\epsilon_T)$  (assuming constant volume, i.e. a Poisson's ratio of 0.5) and  $\epsilon_T = \ln(L/L_0)$ . Yield stress and strain were defined as a sharp drop in stiffness at a characteristic stress and strain level; thread stiffness was determined both for the initial loading of the thread and at thread failure. The area under the stress-strain curve (the energy absorbed per unit volume, or the toughness of the material) was determined by fitting a polynomial to the curve and integrating over the total strain. A Microsoft® Excel® version of this file is available from the authors upon request.
